# Supplementary material
Source: publisher site journal article supplement (https://static.cambridge.org/content/id/urn:cambridge.org:id:article:S0899823X20012313/resource/name/S0899823X20012313supp001.docx)
Supplement: Supplementary file 1 [file S0899823X20012313supp001.docx]

| **Supplemental Table 1.** Visits and Antibiotic Prescriptions for Bronchitis and Bronchiolitis in EDs and Physician Offices, Children 0-18 Years, US NAMCS/NHAMCS, By Year | | | |
| --- | --- | --- | --- |
| **Year** | **Weighted Estimated Number of Visits with Diagnosis (95% CI) Per Year** | **Estimated % visits with Antibiotics Prescribed (95% CI) Per Yeara** | **P*** |
| 2006 | 4,011,322 (2,492,378, 5,530,266) | 59.51 (46.19, 72.83) | 0.18 |
| 2007 | 3,399,255 (2,389,530, 4,408,978) | 55.48 (43.01, 67.94) |  |
| 2008 | 2,381,892 (1,433,997, 3,329,787) | 72.56 (60.15, 84.98) |  |
| 2009 | 3,466,706 (2,288,138, 4,645,274) | 60.10 (47.91, 72.28) |  |
| 2010 | 3,486,886 (1,593,860, 5,379,912) | 66.63 (55.49, 77.78) |  |
| 2011 | 4,027,891 (1,696,107, 6,359,675) | 46.27 (34.28, 58.25) |  |
| 2012 | 2,805,541 (2,129,358, 3,481,723) | 54.10 (43.96, 64.25) |  |
| 2013 | 2,485,424 (1,772,680, 3,198,167) | 51.17 (41.29, 61.04) |  |
| 2014 | 1,962,470 (1,399,567, 2,525,374) | 57.43 (45.14, 69.72) |  |
| 2015 | 1,767,219 (947,662, 2,586,775) | 59.89 (39.06, 80.72) |  |

a. Calculated as number of visits for diagnoses with an antibiotic prescription as the numerator and the total number of visits for diagnoses as the denominator

*using chi-square test for differences among years for proportion of visits with antibiotics prescribed
